# Supplementary material
Source: MDPI journal article supplement (https://www.mdpi.com/2076-3417/8/11/2103)
Supplement: s1 [file s1]

# Supplementary Materials: Effect of Ultrafast Imaging on Shear Wave Visualization and Characterization: An Experimental and Computational Study in a Pediatric Ventricular Model

Ziqiu Xue, Ji-Quan Shi, Yoshiaki Yamauchi, and Sevet Durucan

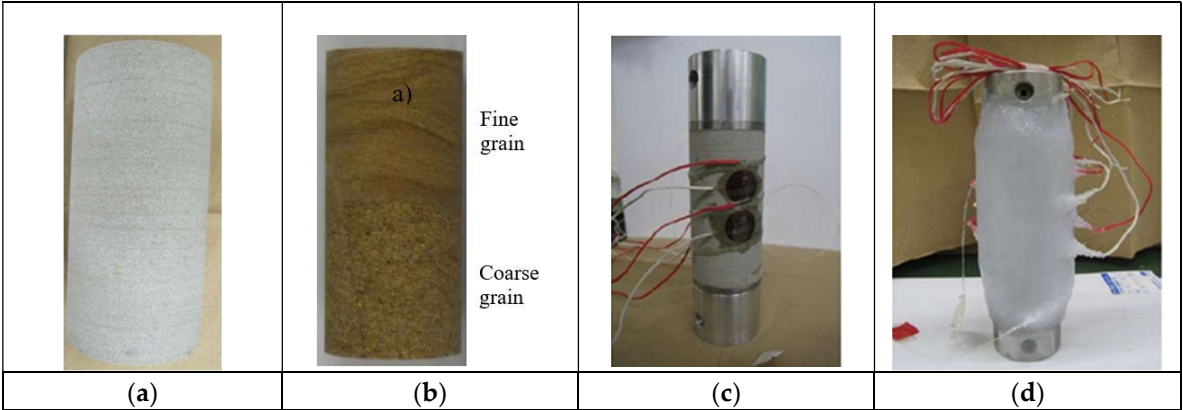

**Figure S-1.** (a) Berea core sample; (b) Tako core sample; (c) instrumented core sample; (d) sample coated with silicone rubber.

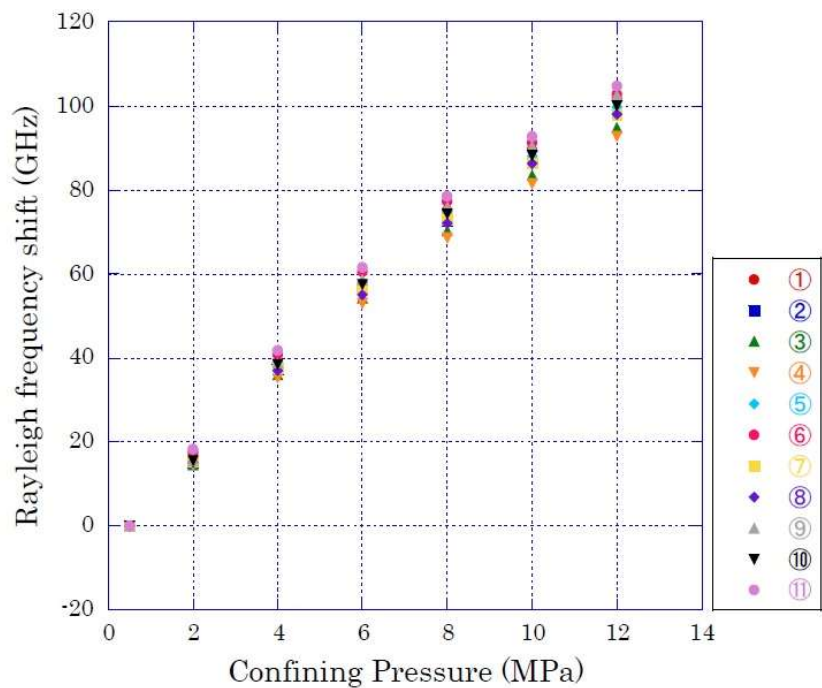

**Figure S-2.** Berea core Rayleigh frequency shift measurements at the 11 censoring points with increasing confining pressure.

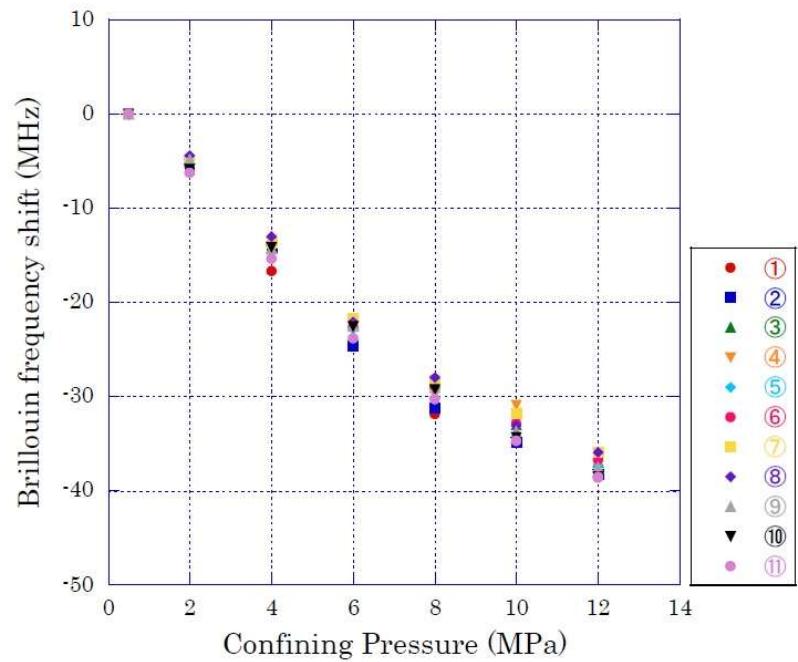

**Figure S-3.** Berea core Brillouin frequency shift measurements at the 11 censoring points with increasing confining pressure.

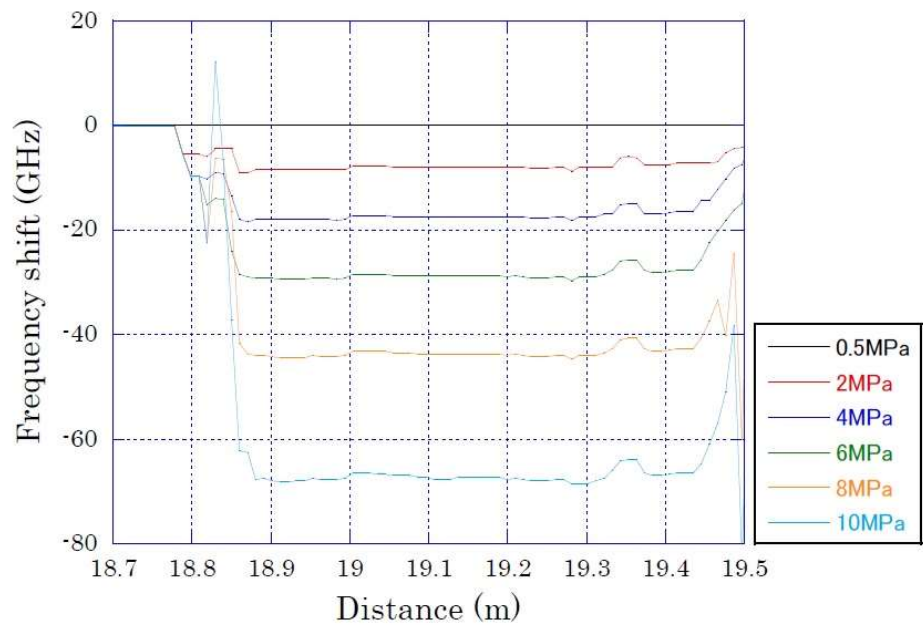

**Figure S-4.** Rayleigh frequency shift measurements with increasing pore pressures.

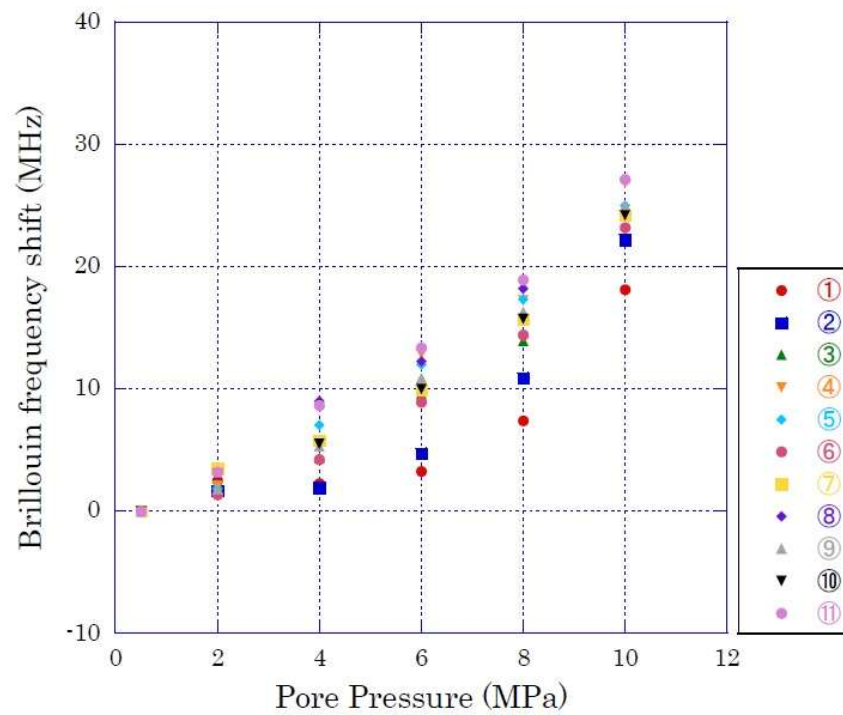

**Figure S-5.** Berea core Brillouin frequency shift measurements at the 11 censoring points with increasing pore pressure showing considerable scattering.
